# Supplementary material for: Stabilities of group-III phosphide (MP, M = B, Al, Ga and In) monolayers in oxygen and water environments
Source: Royal Society of Chemistry journal article supplement (doi:10.1039/d0cp00224k), 2020-01-01
Supplement: d0cp00224k1.pdf [file d0cp00224k1.pdf]

## Supporting Information

# Stabilities of group-III phosphide (MP, M = B, Al, Ga and In) monolayers in oxygen and water environments

Jie Wu, Jia-Hui Li, Yang-Xin Yu\*

*Laboratory of Chemical Engineering Thermodynamics, Department of Chemical Engineering, Tsinghua University, Beijing 100084, People's Republic of China*

\*Corresponding author.

E-mail: yangxyu@mail.tsinghua.edu.cn

Phone: +86-10-62782558

Fax: +86-10-62770304

In supporting information, additional results mainly about the calculated properties of two-dimensional (2D) and three-dimensional (3D) group-III phosphides (MPs) are presented. Table S1 provides the calculated and experimental structural properties of 3D MPs with a zinc-blende (ZB) structure, and Table S3 provides the calculated mechanical properties of the 2D GeS monolayer and graphene along with the theoretical values in literature. These two tables are used to examine the reliability of our method. The cohesive energies of the 2D V-BP, H-AIP, H-GaP and H-InP and their energy differences with corresponding 3D materials are listed in Table S2, which complements Table 1 in the main text. If not otherwise specified in this paper, the group-III phosphide (BP, AIP, GaP and InP) monolayers refer to the single layer H-BP, V-AIP, V-GaP and V-InP nanosheets.

Figure S1 displays the AIMD results of group-III phosphide monolayers in the vacuum. As shown in Figures S2-S9, the adsorption of an oxygen atom and molecule on the high-symmetry sites of group-III phosphide monolayers were carefully investigated to find their most favorable adsorption sites. Similarly, Figures S10-S21 represent the adsorption of a water molecule, H atom and OH group on the high-symmetry sites of group-III phosphide monolayers. In these figures, the values of  $\Delta E$  are defined as the energy differences relative to corresponding most stable structure.

**Table S1.** Lattice constants ( $a$ ) and bulk modulus ( $B$ ) of 3D MPs with a ZB structure

|     | $a$ (Å)      |                   | $B$ (GPa)    |                  |
|-----|--------------|-------------------|--------------|------------------|
|     | Present work | Experimental      | Present work | Experimental     |
| BP  | 4.523        | 4.54 <sup>a</sup> | 174.0        | 173 <sup>b</sup> |
| AIP | 5.444        | 5.45 <sup>a</sup> | 91.2         | 86 <sup>a</sup>  |
| Gap | 5.430        | 5.45 <sup>a</sup> | 88.5         | 91 <sup>c</sup>  |
| InP | 5.863        | 5.87 <sup>a</sup> | 66.2         | 72 <sup>a</sup>  |

<sup>a</sup> Data from Wyckoff,<sup>1</sup> <sup>b</sup> from Schroten et al.,<sup>2</sup> and <sup>c</sup> from Bliss.<sup>3</sup>

**Table S2.** Cohesive energies ( $E_{coh}$ ) of 2D V-BP, H-AIP, H-GaP and H-InP, and energy differences ( $E_d$ ) between the 2D materials and corresponding 3D crystals at 0 K

|                                    | V-BP   | H-AIP  | H-GaP  | H-InP  |
|------------------------------------|--------|--------|--------|--------|
| $E_{coh}$ (eV atom <sup>-1</sup> ) | -4.731 | -3.565 | -3.090 | -2.752 |
| $E_d$ (eV atom <sup>-1</sup> )     | 0.803  | 0.685  | 0.638  | 0.653  |

**Table S3.** In-plane elastic stiffness ( $C_{11}$ ,  $C_{22}$  and  $C_{12}$ ), in-plane Young's modulus and Possion's ratio of 2D graphene and GeS monolayer at 0K

| material                                 | $C_{11}$<br>(N m <sup>-1</sup> ) | $C_{22}$<br>(N m <sup>-1</sup> ) | $C_{12}$<br>(N m <sup>-1</sup> ) | $E_x$<br>(N m <sup>-1</sup> ) | $E_y$<br>(N m <sup>-1</sup> ) | $\nu_{xy}$ | $\nu_{yx}$ |
|------------------------------------------|----------------------------------|----------------------------------|----------------------------------|-------------------------------|-------------------------------|------------|------------|
| graphene (this work)                     | 347.5                            | 347.5                            | 60.63                            | 336.9                         | 336.9                         | 0.17       | 0.17       |
| graphene (Topsakal et al. <sup>4</sup> ) | 343.8                            | 343.8                            | 59.1                             | 335                           | 335                           | 0.16       | 0.16       |
| GeS (this work)                          | 49.1                             | 14.0                             | 21.9                             | 14.9                          | 4.2                           | 1.56       | 0.45       |
| GeS (Qin et al. <sup>5</sup> )           | 38.9                             | 10.9                             | 16.6                             | 13.6                          | 3.8                           | 1.52       | 0.43       |

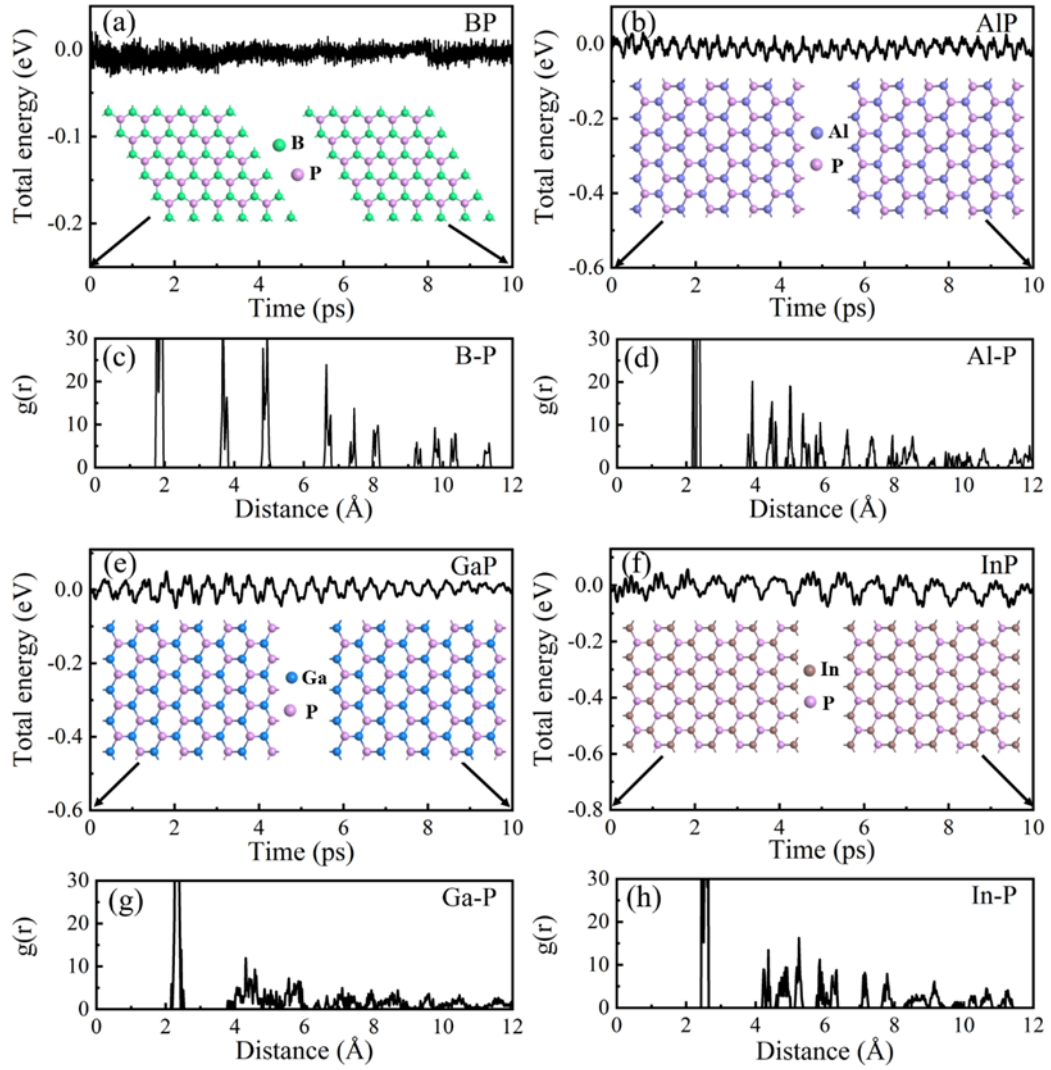

**Fig. S1** The evolution of the relative total energies of the (a) BP, (b) AlP, (e) GaP and (f) InP monolayers in a vacuum in the AIMD simulations at 300 K and the snapshot structures of the 2D systems at 0 ps and 10 ps. The normalized radial distribution functions  $g(r)$  for (c) BP, (d) AlP, (g) GaP and (h) InP after annealing at 300 K for 10 ps.

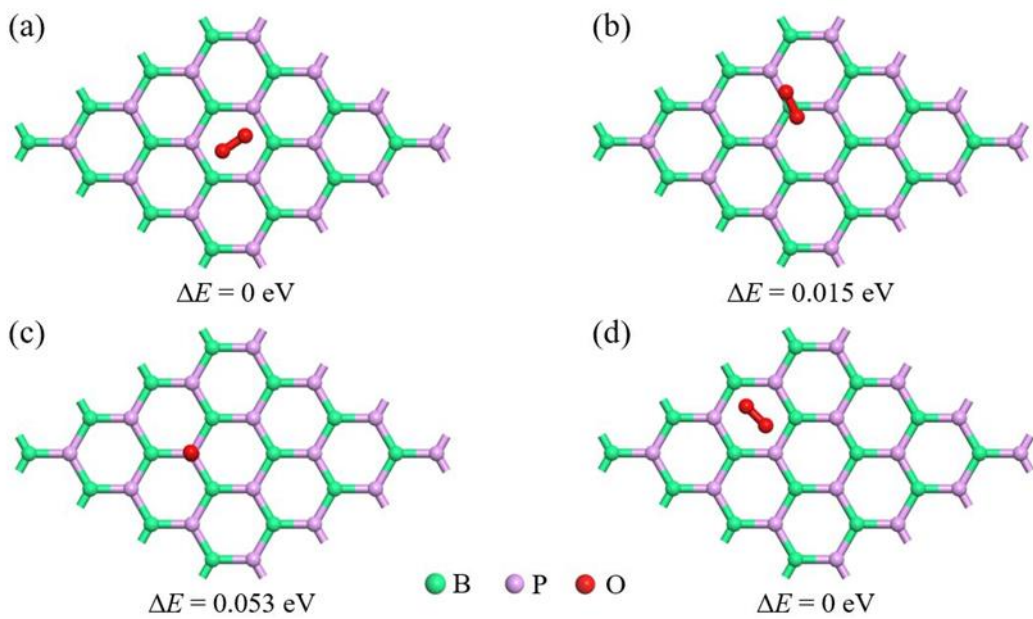

**Fig. S2** Equilibrium structures of an oxygen molecule initially adsorbed on the (a) H, (b) T1, (c) T2, and (d) B sites of the BP monolayer. H, T1, T2 and B stand for hollow, top of B atom, top of P atom, and bridge, respectively. The values of  $\Delta E$  are the energy differences relative to the most stable structure.

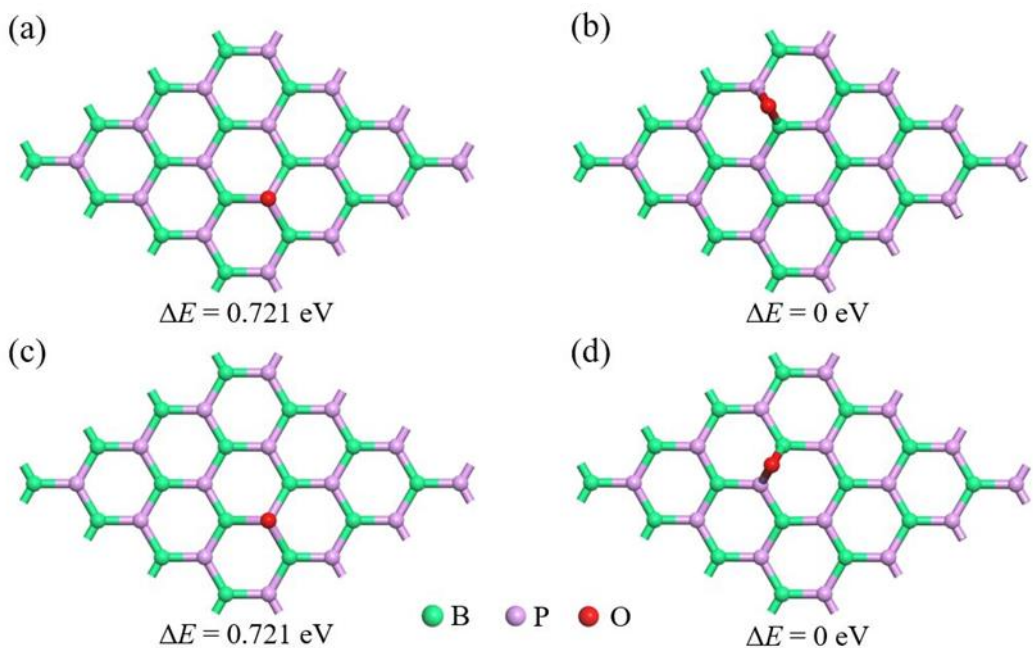

**Fig. S3** Equilibrium structures of an oxygen atom initially adsorbed on the (a) H, (b) T1, (c) T2, and (d) B sites of the BP monolayer. H, T1, T2 and B stand for hollow, top of B atom, top of P atom, and bridge, respectively.

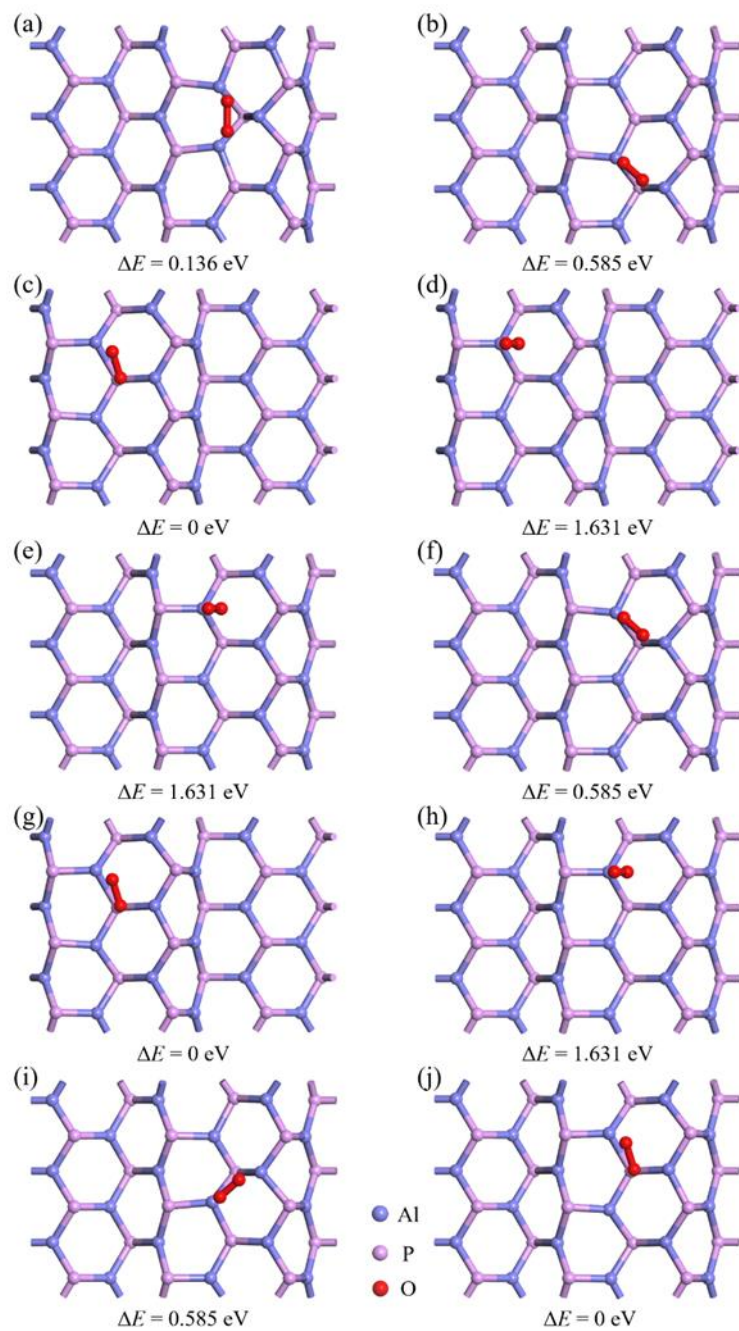

**Fig. S4** Equilibrium structures of an oxygen molecule initially adsorbed on the (a) H1, (b) H2, (c) T1, (d) T2, (e) T3, (f) T4, (g) B1, (h) B2, (i) B3, and (j) B4 sites of the AlP monolayer. H, T1 (3), T2 (4) and B stand for hollow, top of Al atom, top of P atom, and bridge, respectively.

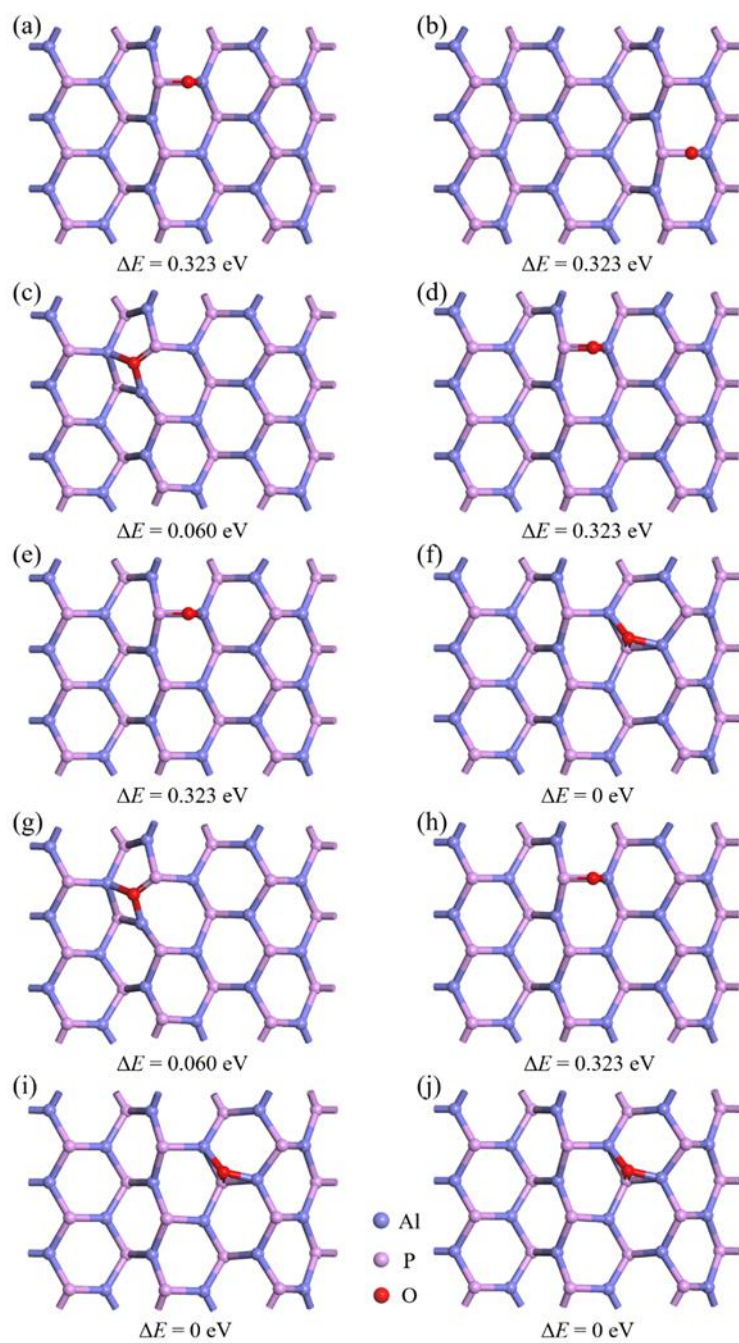

**Fig. S5** Equilibrium structures of an oxygen atom initially adsorbed on the (a) H1, (b) H2, (c) T1, (d) T2, (e) T3, (f) T4, (g) B1, (h) B2, (i) B3, and (j) B4 sites of the AlP monolayer. H, T1 (3), T2 (4) and B stand for hollow, top of Al atom, top of P atom, and bridge, respectively.

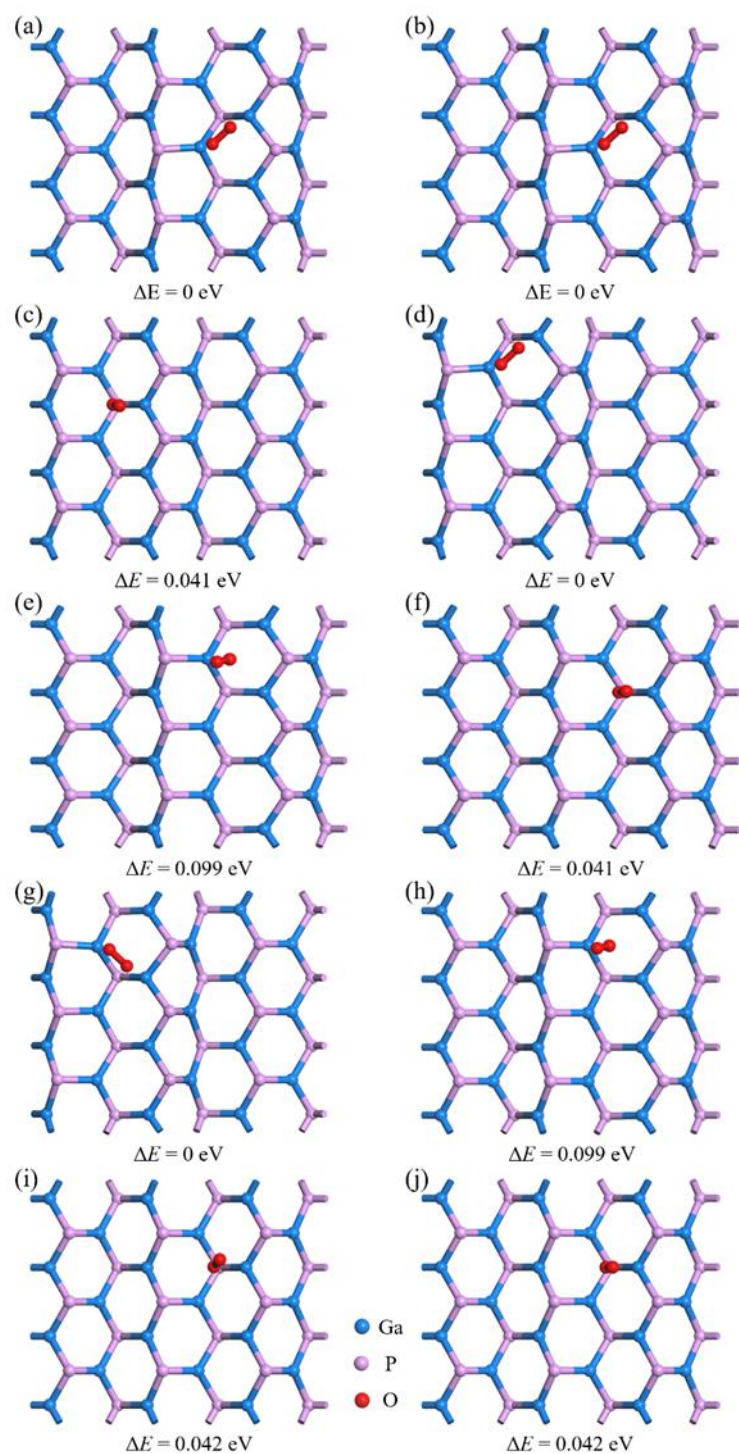

**Fig. S6** Equilibrium structures of an oxygen molecule initially adsorbed on the (a) H1, (b) H2, (c) T1, (d) T2, (e) T3, (f) T4, (g) B1, (h) B2, (i) B3, and (j) B4 sites of the GaP monolayer. H, T1 (3), T2 (4) and B stand for hollow, top of Ga atom, top of P atom, and bridge, respectively.

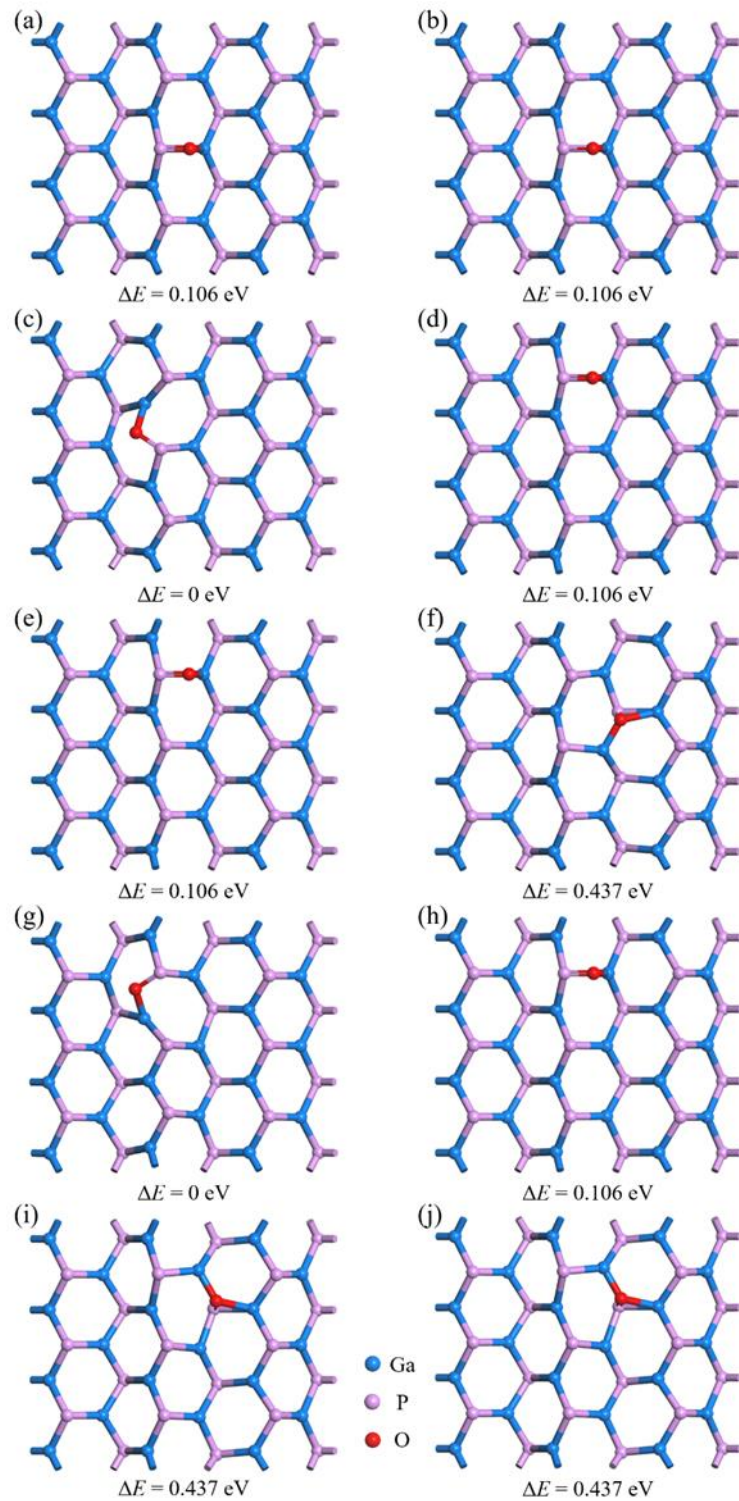

**Fig. S7** Equilibrium structures of an oxygen atom initially adsorbed on the (a) H1, (b) H2, (c) T1, (d) T2, (e) T3, (f) T4, (g) B1, (h) B2, (i) B3, and (j) B4 sites of the GaP monolayer. H, T1 (3), T2 (4) and B stand for hollow, top of Ga atom, top of P atom, and bridge, respectively.



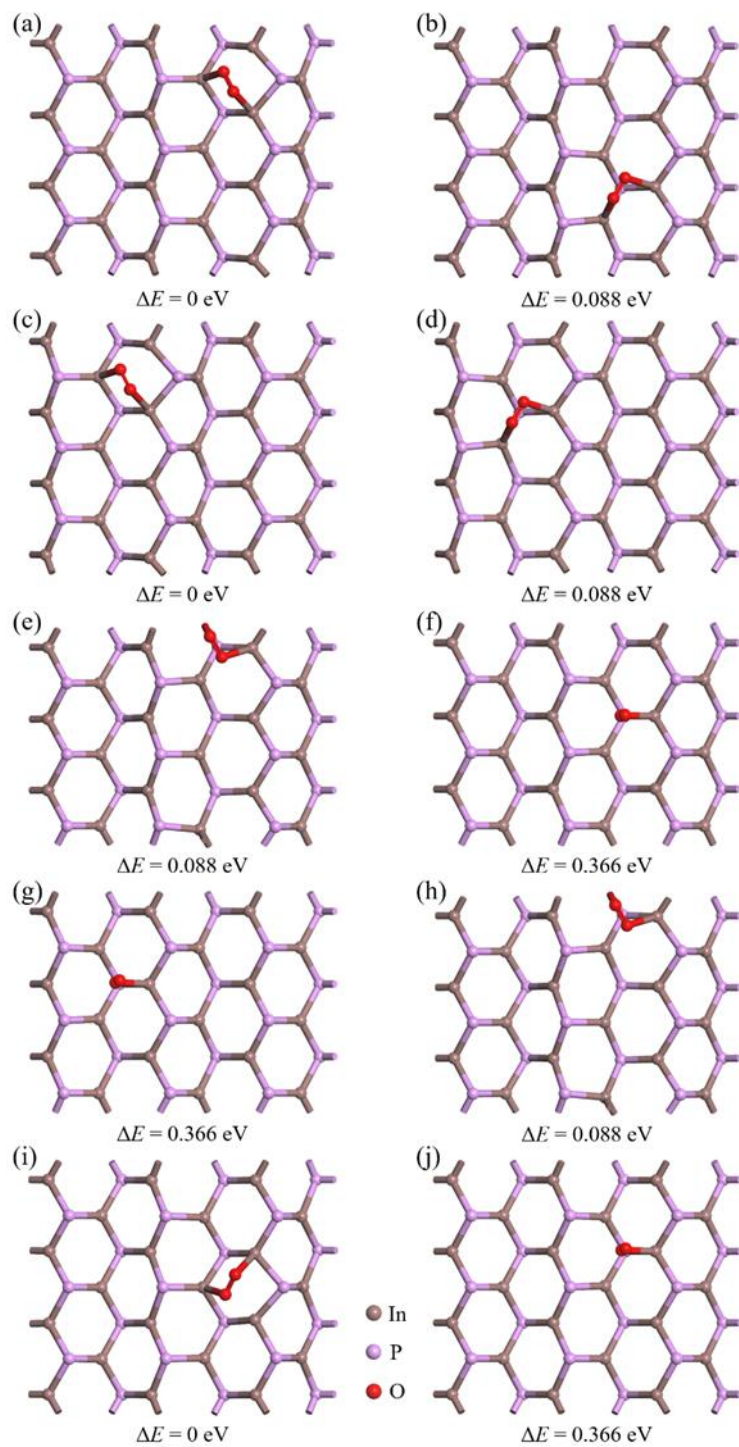

**Fig. S8** Equilibrium structures of an oxygen molecule initially adsorbed on the (a) H1, (b) H2, (c) T1, (d) T2, (e) T3, (f) T4, (g) B1, (h) B2, (i) B3, and (j) B4 sites of the InP monolayer. H, T1 (3), T2 (4) and B stand for hollow, top of In atom, top of P atom, and bridge, respectively.

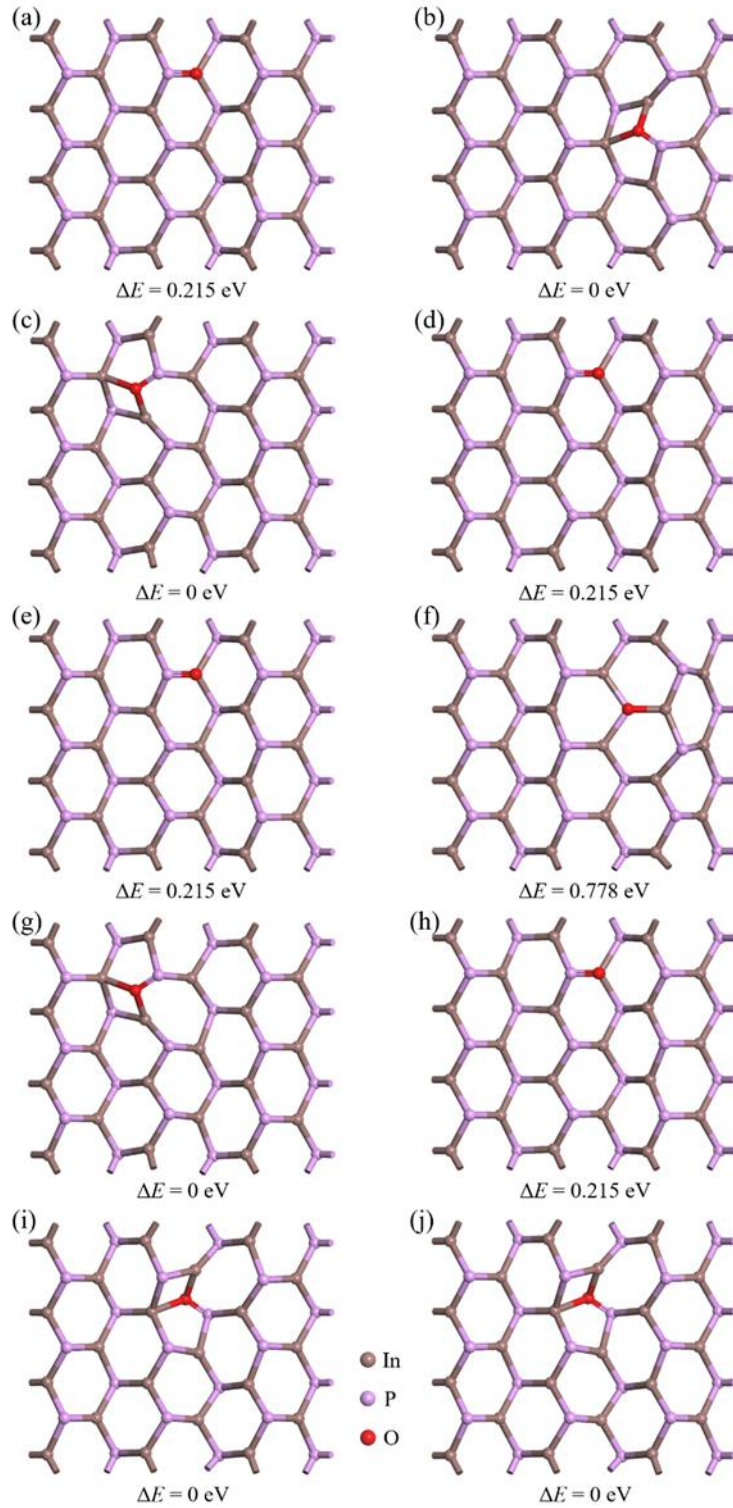

**Fig. S9** Equilibrium structures of an oxygen atom initially adsorbed on the (a) H1, (b) H2, (c) T1, (d) T2, (e) T3, (f) T4, (g) B1, (h) B2, (i) B3, and (j) B4 sites of the InP monolayer. H, T1 (3), T2 (4) and B stand for hollow, top of In atom, top of P atom, and bridge, respectively.

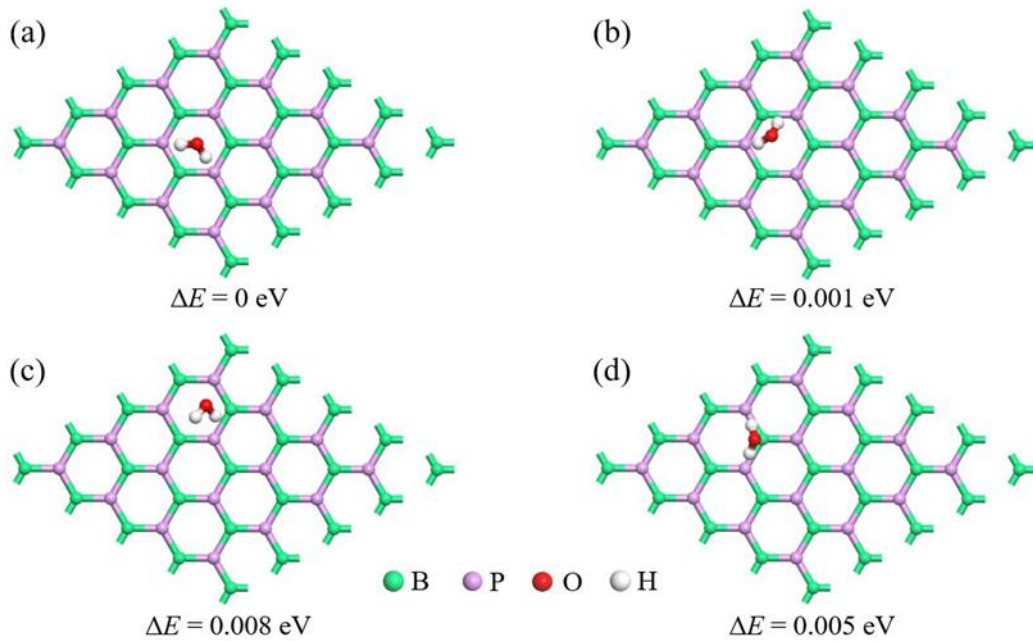

**Fig. S10** Equilibrium structures of a water molecule initially adsorbed on the (a) H, (b) T1, (c) T2, and (d) B sites of the BP monolayer. H, T1, T2 and B stand for hollow, top of B atom, top of P atom, and bridge, respectively. The values of  $\Delta E$  are the energy differences relative to the most stable structure.

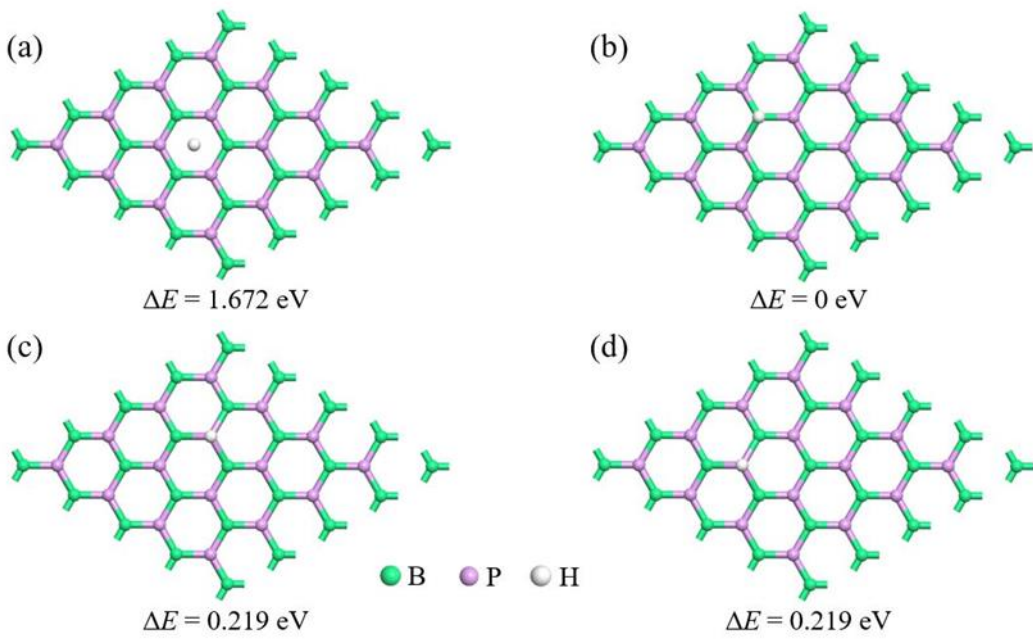

**Fig. S11** Equilibrium structures of a hydrogen atom adsorbed on the (a) H, (b) T1, (c) T2, and (d) B sites of the BP monolayer. H, T1, T2 and B stand for hollow, top of B atom, top of P atom, and bridge, respectively.

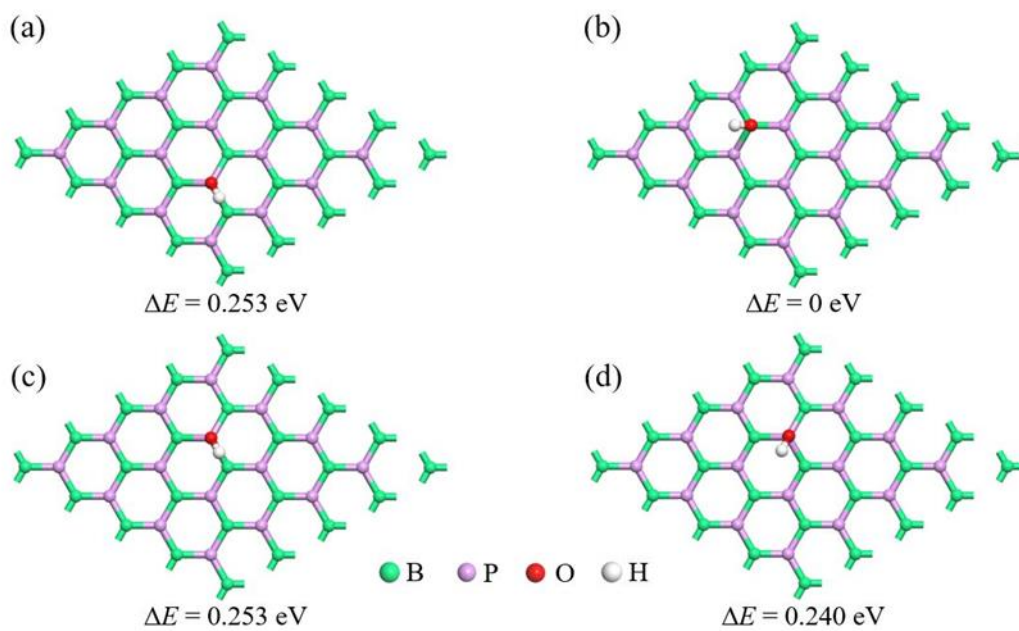

**Fig. S12** Equilibrium structures of an OH group initially adsorbed on the (a) H, (b) T1, (c) T2, and (d) B sites of the BP monolayer. H, T1, T2 and B stand for hollow, top of B atom, top of P atom, and bridge, respectively.

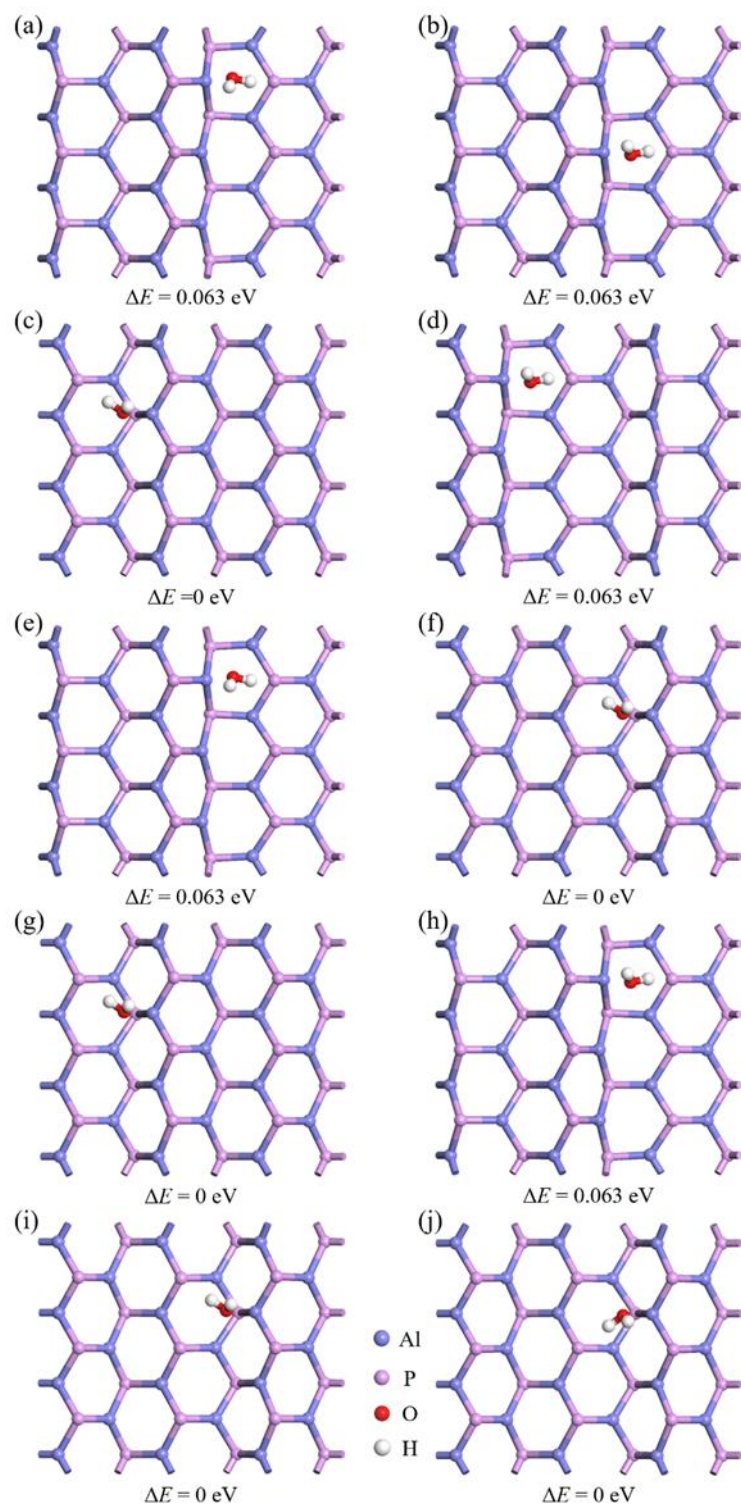

**Fig. S13** Equilibrium structures of a water molecule initially adsorbed on the (a) H1, (b) H2, (c) T1, (d) T2, (e) T3, (f) T4, (g) B1, (h) B2, (i) B3, and (j) B4 sites of the AlP monolayer. H, T1 (3), T2 (4) and B stand for hollow, top of Al atom, top of P atom, and bridge, respectively.

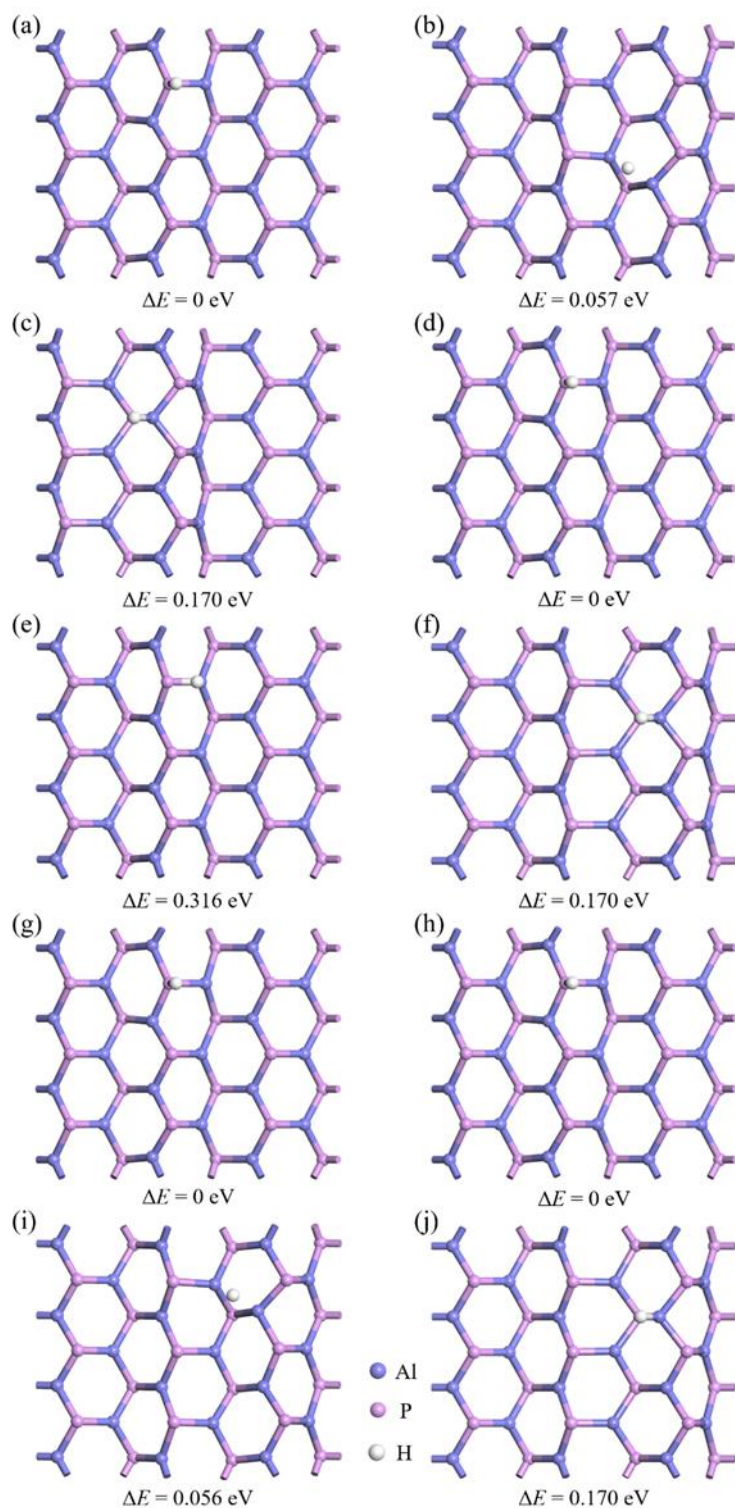

**Fig. S14** Equilibrium structures of a hydrogen atom initially adsorbed on the (a) H1, (b) H2, (c) T1, (d) T2, (e) T3, (f) T4, (g) B1, (h) B2, (i) B3, and (j) B4 sites of the AlP monolayer. H, T1 (3), T2 (4) and B stand for hollow, top of Al atom, top of P atom, and bridge, respectively.

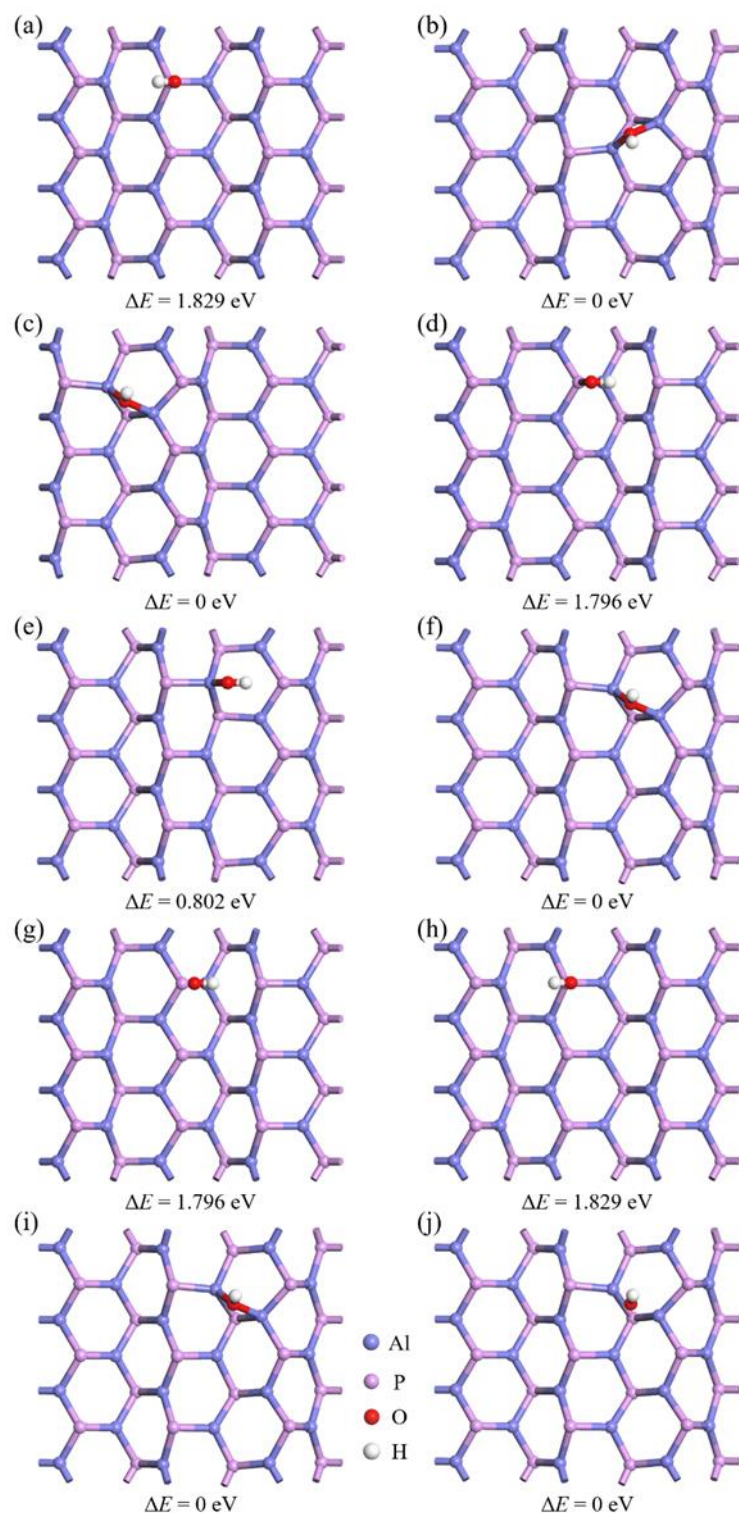

**Fig. S15** Equilibrium structures of an OH group initially adsorbed on the (a) H1, (b) H2, (c) T1, (d) T2, (e) T3, (f) T4, (g) B1, (h) B2, (i) B3, and (j) B4 sites of the AlP monolayer. H, T1 (3), T2 (4) and B stand for hollow, top of Al atom, top of P atom, and bridge, respectively.

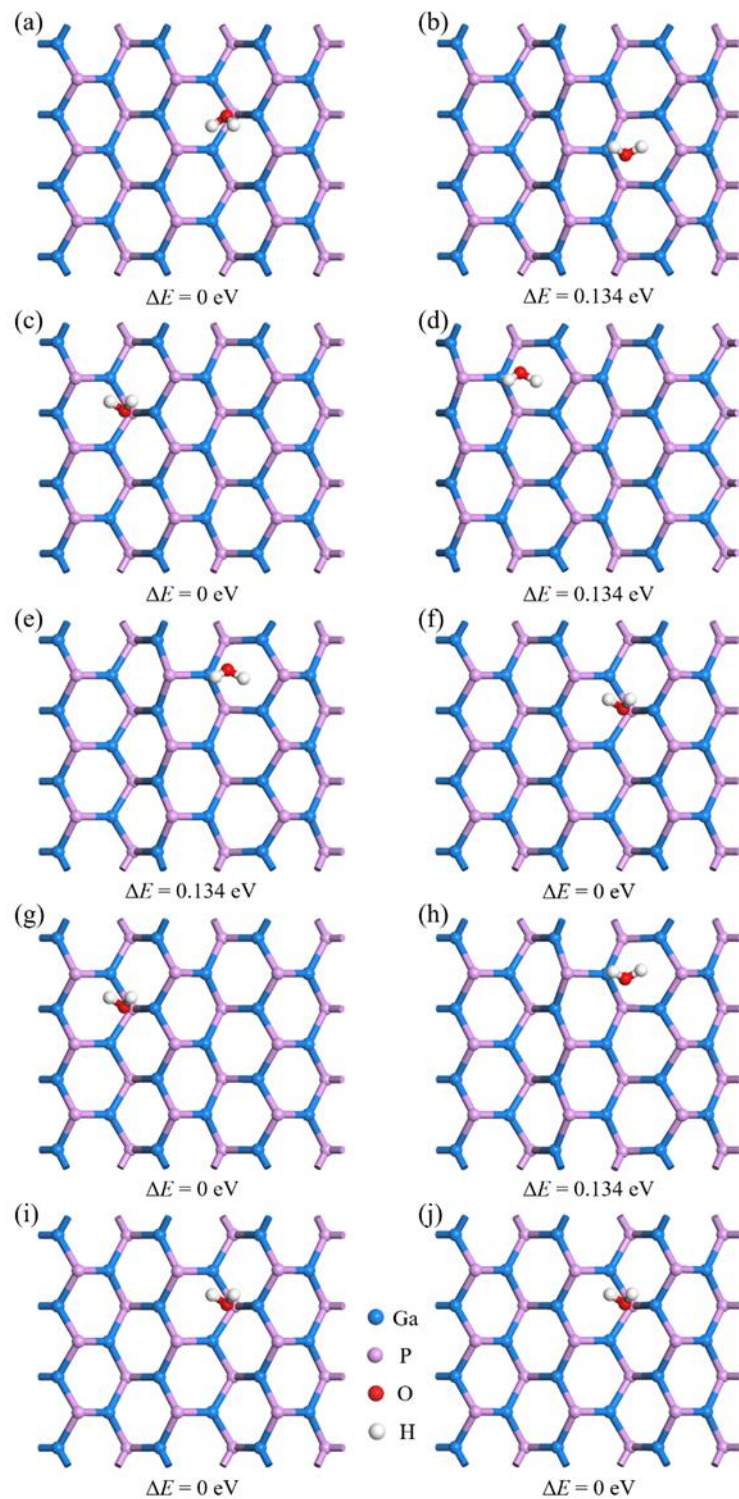

**Fig. S16** Equilibrium structures of a water molecule initially adsorbed on the (a) H1, (b) H2, (c) T1, (d) T2, (e) T3, (f) T4, (g) B1, (h) B2, (i) B3, and (j) B4 sites of the GaP monolayer. H, T1 (3), T2 (4) and B stand for hollow, top of Ga atom, top of P atom, and bridge, respectively.



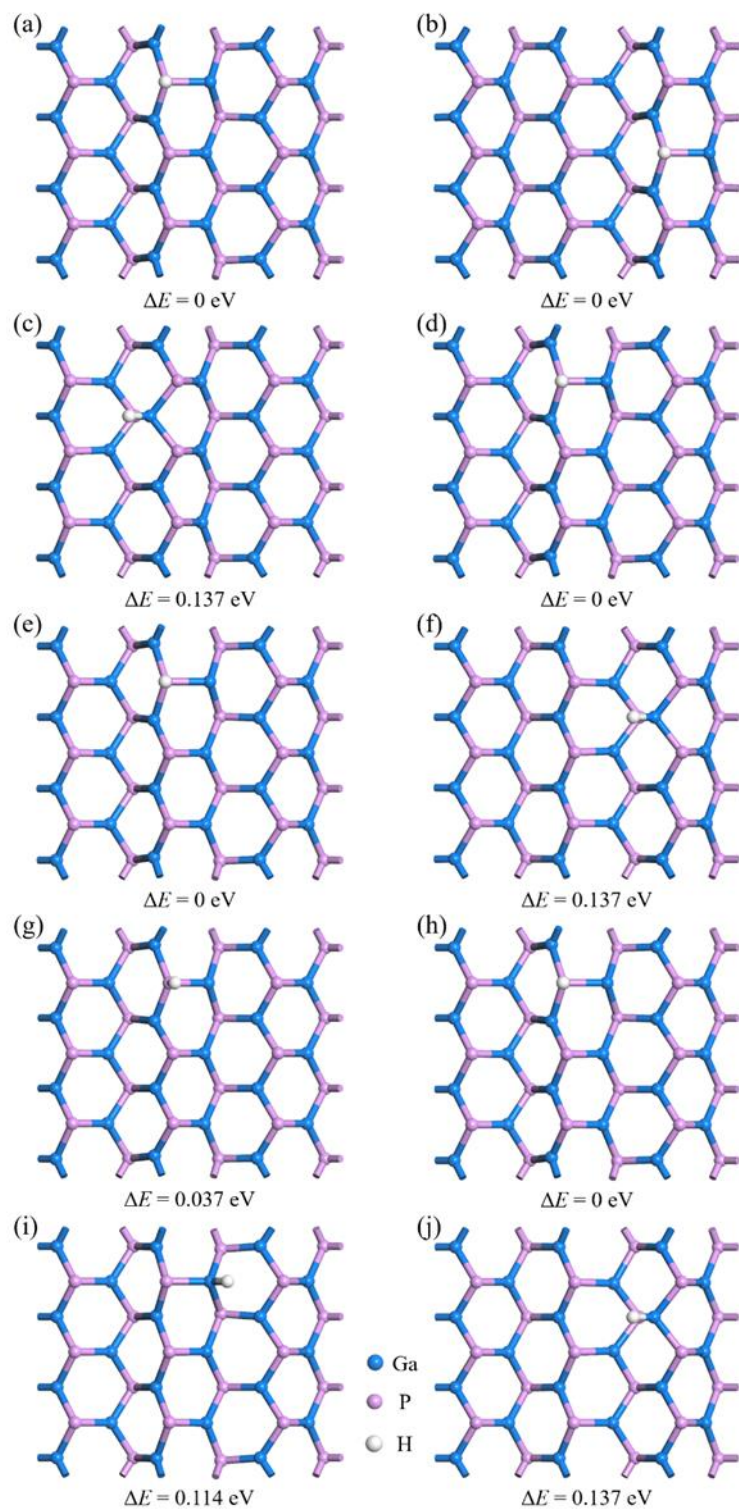

**Fig. S17** Equilibrium structures of a hydrogen atom initially adsorbed on the (a) H1, (b) H2, (c) T1, (d) T2, (e) T3, (f) T4, (g) B1, (h) B2, (i) B3, and (j) B4 sites of the GaP monolayer. H, T1 (3), T2 (4) and B stand for hollow, top of Ga atom, top of P atom, and bridge, respectively.

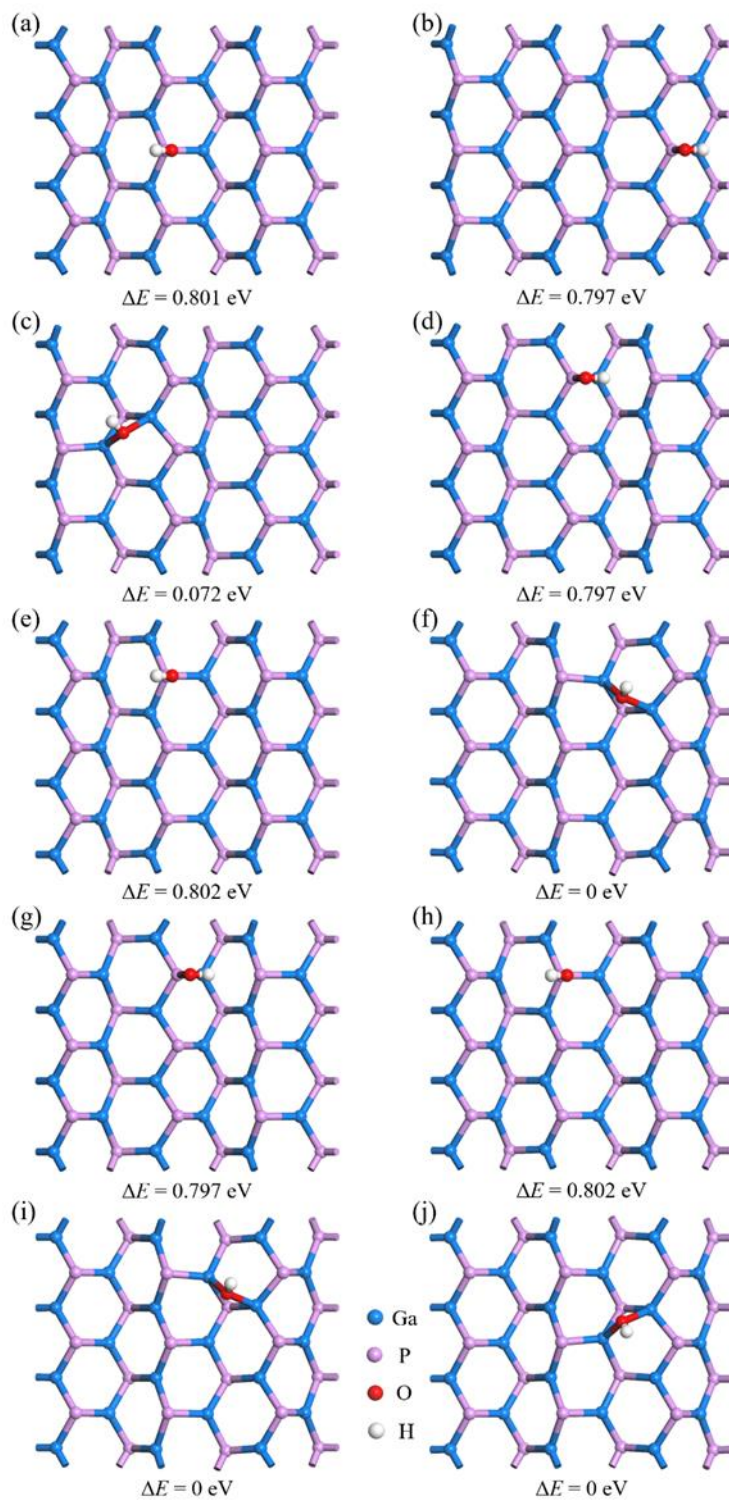

**Fig. S18** Equilibrium structures of an OH group initially adsorbed on the (a) H1, (b) H2, (c) T1, (d) T2, (e) T3, (f) T4, (g) B1, (h) B2, (i) B3, and (j) B4 sites of the GaP monolayer. H, T1 (3), T2 (4) and B stand for hollow, top of Ga atom, top of P atom, and bridge, respectively.

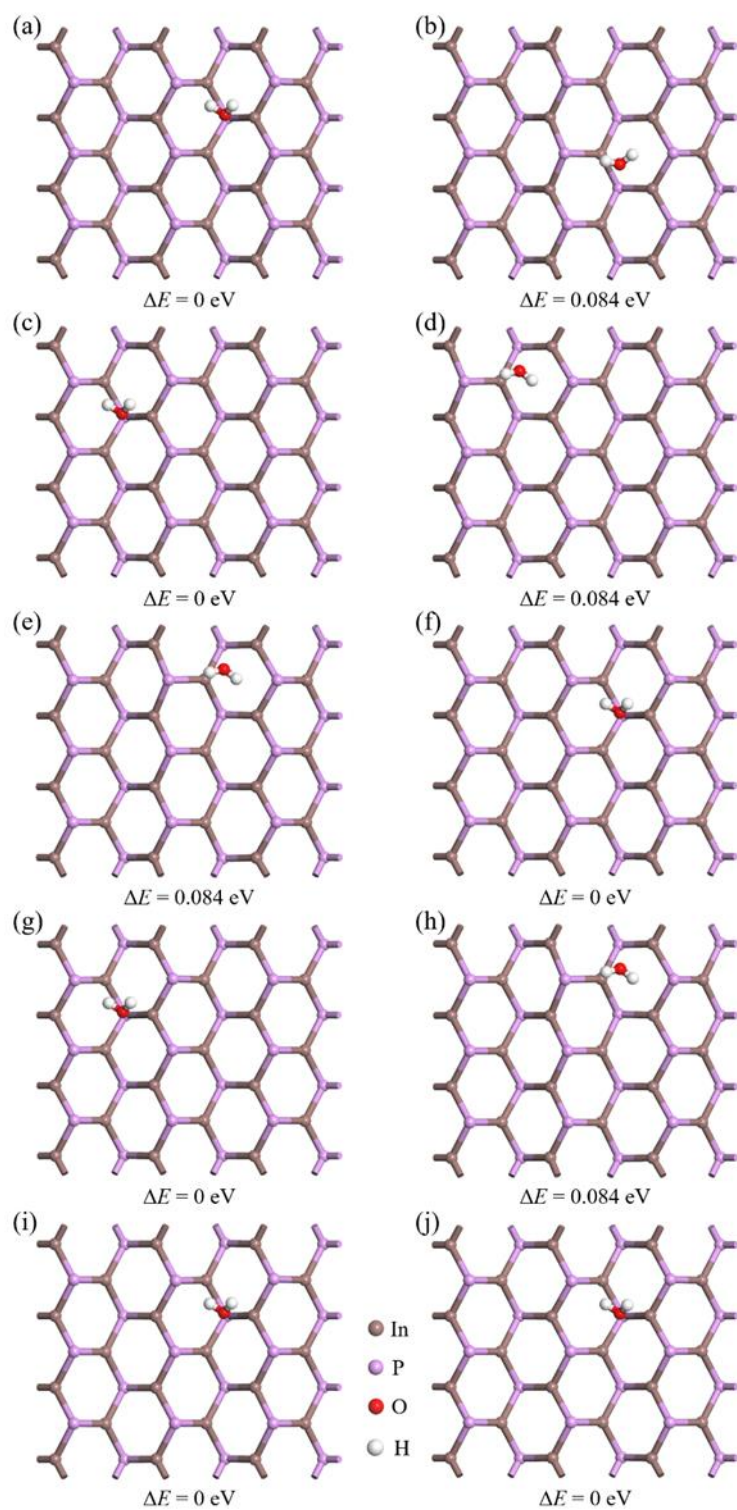

**Fig. S19** Equilibrium structures of a water molecule initially adsorbed on the (a) H1, (b) H2, (c) T1, (d) T2, (e) T3, (f) T4, (g) B1, (h) B2, (i) B3, and (j) B4 sites of the InP monolayer. H, T1 (3), T2 (4) and B stand for hollow, top of In atom, top of P atom, and bridge, respectively.

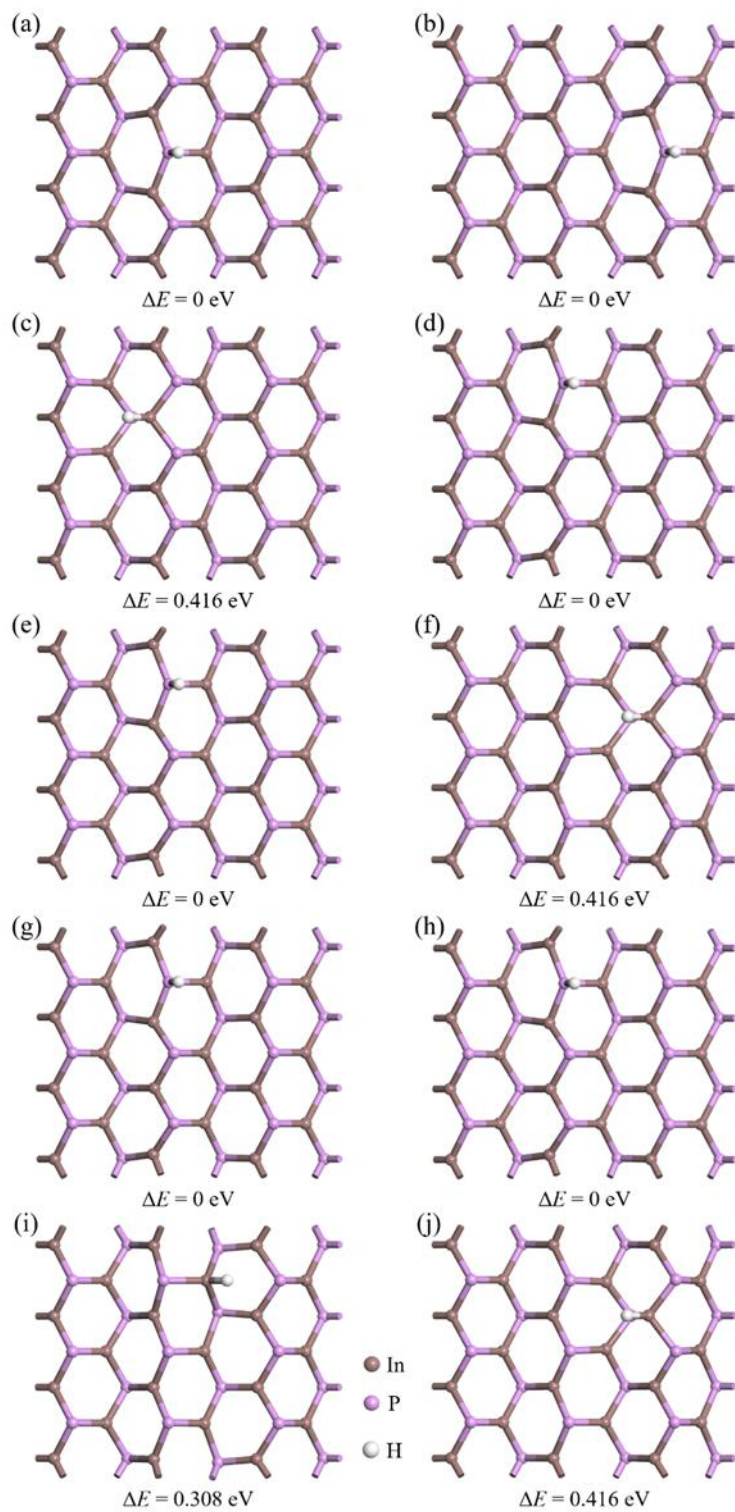

**Fig. S20** Equilibrium structures of a hydrogen atom initially adsorbed on the (a) H1, (b) H2, (c) T1, (d) T2, (e) T3, (f) T4, (g) B1, (h) B2, (i) B3, and (j) B4 sites of the InP monolayer. H, T1 (3), T2 (4) and B stand for hollow, top of In atom, top of P atom, and bridge, respectively.

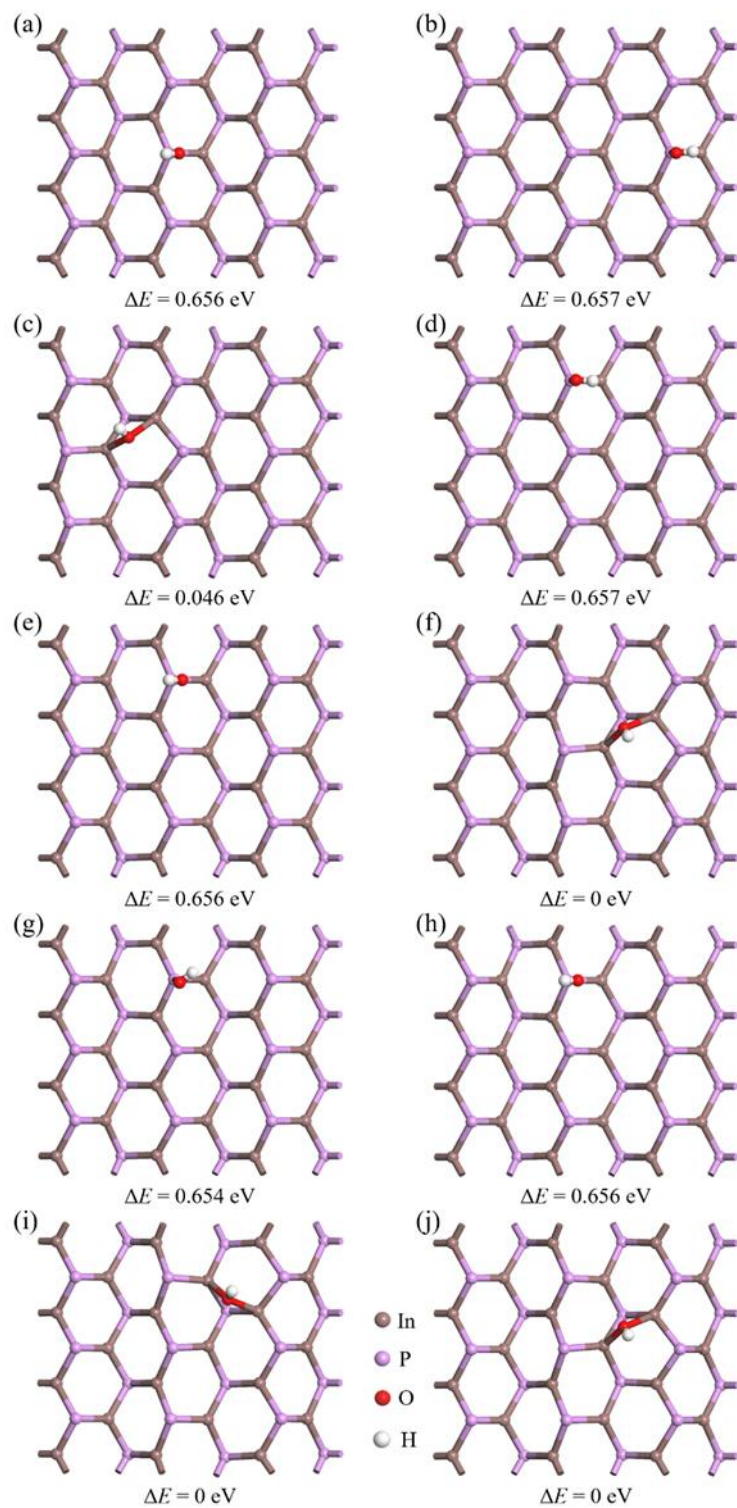

**Fig. S21** Equilibrium structures of an OH group initially adsorbed on the (a) H1, (b) H2, (c) T1, (d) T2, (e) T3, (f) T4, (g) B1, (h) B2, (i) B3, and (j) B4 sites of the InP monolayer. H, T1 (3), T2 (4) and B stand for hollow, top of In atom, top of P atom, and bridge, respectively.

## REFERENCES

1. R.W.G. Wyckoff, *Crystal Structure*, 2<sup>nd</sup> ed.; Interscience: New York, 1963-1964.
2. E. Schrotten, A. Goossens, J. Schoonman, Photo- and Electroreflectance of Cubic Boron Phosphide. *J. Appl. Phys.* **1998**, *83*, 1660-1663.
3. D.F. Bliss, Indium Phosphide. In *Single Crystals of Electronic Materials: Growth and Properties*, R. Fornari, Ed. Woodhead Publ Ltd: Cambridge, 2019; pp 241-272.
4. M. Topsakal, S. Cahangirov, S. Ciraci, The Response of Mechanical and Electronic Properties of Graphane to the Elastic Strain. *Appl. Phys. Lett.* **2010**, *96*, 091912.
5. G.Z. Qin, Z.Z. Qin, W.Z. Fang, L.C. Zhang, S.Y. Yue, Q.B. Yan, M. Hu, G. Su, Diverse Anisotropy of Phonon Transport in Two-Dimensional Group IV-VI Compounds: A Comparative Study. *Nanoscale* **2016**, *8*, 11306-11319.
